# Supplementary material
Source: publisher figshare collection journal article supplement (https://sage.figshare.com/ndownloader/files/18169652)
Supplement: Supplementary file 1 [file 18169652]

## **Spousal relative income and male psychological distress**

### **METHODOLOGY FILE**

#### **Data**

This study uses US data from the Panel Study of Income Dynamics (PSID), which is a longitudinal household survey collecting a wide range of individual and household demographic, income, labour market, and health variables biennially. Given the topic of this research, the final sample consists exclusively of married heterosexual individuals, 6,288 couples with a total number of observations equal to 20,398 over 2001-2015 biennial waves.

All details can be found at: <https://psidonline.isr.umich.edu/>

Estimation procedures are described in detail in the article. Below detailed variable codebook descriptions.

#### **Variable definitions**

##### **"K-6 NON-SPEC PSYCHOL DISTRESS SCALE "**

The K-6 Non-Specific Psychological Distress Scale

This scale was developed by Dr Ronald Kessler, Professor of Healthcare Policy at Harvard Medical School. It includes six items, using a scale of 1-5, which ranges from 'all of the time' to 'none of the time.' The items are rescored as follows: A response of 'All of the Time' = 4 points, 'Most of the Time' = 3 points, 'Some of the Time' = 2 points, 'A Little of the Time' = 1 point, and 'None of the Time' = 0 points. The scores are summed.

##### **Codes**

0 - 24 Actual total score

99 NA, DK to at least one item; respondent was not head or wife/"wife"

##### **"COUPLE STATUS OF HEAD "**

Couple Status of Head

##### **Codes**

1 Head with wife present in FU

2 Head with "wife" present in FU\*

3 Head (female) with husband present in FU

4 Head with first-year cohabitor present in FU

5 Head with no wife, "wife", husband, or first-year cohabitor present in FU

\* cohabitor, referred to as "wife"

##### **"MARITAL STATUS-GENERATED "**

Marital Status of Head

This version of marital status is comparable to 1968-1976 data, in which no distinction was made between those legally married and those who merely cohabited.

##### **Codes**

1 Married or permanently cohabiting; wife, "wife," or husband is present in the FU

2 Single, never legally married and no wife, "wife," or husband is present in the FU

3 Widowed and no wife, "wife," or husband is present in the FU

4 Divorced and no wife, "wife," or husband is present in the FU

**"WHO WAS RESPONDENT M1 "**

M1. Who was respondent? (Relation to Head)

**Codes**

1 Head

2 Wife

7 Other than Head or Wife

9 NA

**"R2 LABOR INCOME (HD) "**

Earlier you reported that (you were/Head was) working in 20XX. Thinking now about all the work for

money that you did during 20XX, including jobs, businesses self-employment and part-time work, about how much did you earn altogether in 20XX? Please include any income from bonuses, overtime, tips or commissions. –AMOUNT. IF NECESSARY: Please give me your best estimate.

**Codes**

-999,999.00 Loss, DK or NA how much

-999,996.00 - -1.00 Actual loss (self-employment, farm or business loss)

1.00 - 9,999,996.00 Actual amount

9,999,999.00 DK; NA; refused

0.0 Inap.: zero; business or farm broke even; head did not work for money in 20XX

**"R11 LABOR INCOME 2011 (WF) "**

Earlier you reported that (you were/[WIFE/"WIFE"] was) working in 20XX. Thinking now about all the

work for money that you/she did during 20XX, including jobs, businesses self-employment and part-time work, about how much did you/she earn altogether in 20XX? Please include any income from bonuses, overtime, tips or commissions. –AMOUNT. IF NECESSARY: Please give me your best estimate.

**Codes**

-999,999.00 Loss, DK, NA how much

-999,996.00 - -1.00 Actual loss (self-employment, farm or business loss)

1.00 - 9,999,996.00 Actual amount

9,999,999.00 DK; NA; refused

0.0 Inap.: zero; business or farm broke even; no Wife/"Wife" in FU

**"IMP WEALTH W/O EQUITY (WEALTH1)"**

Constructed wealth variable, excluding equity.

Constructed wealth variable, excluding equity. This imputed variable is constructed as the sum of values of seven asset types. All missing data were assigned.

**Codes**

-99,999,997 - -1 Actual amount of negative net worth

1 - 99,999,997 Actual amount of positive net worth

0 Inap.: Does not own any assets; net value is zero

**"F3 HOUSEWORK HOURS-HEAD "**

About how much time (do you/does HEAD) spend on housework in an average week? (I mean time spent cooking, cleaning, and doing other work around the house.) The values for this variable represent the actual number of hours per week Head spends on housework.

**Codes**

0 None

1 - 111 Actual number of hours per week

112 112 hours or more per week

998 DK

999 NA; refused

**"F2 HOUSEWORK HRS-SPOUSE "**

About how much time (do you/does [SPOUSE/PARTNER] spend on housework in an average week? I mean time spent cooking, cleaning, and doing other work around the house. The values for this variable represent the actual number of hours per week Spouse/Partner spends on housework.

**Codes**

1 - 111 Actual number of hours per week

112 112 hours or more per week

998 DK

999 NA; refused

0 Inap.: none; no Spouse/Partner in FU

**"H1 HEALTH STATUS-HEAD "**

Now I have a few questions about (your/HEAD's) health.

Would you say (your/HEAD's) health in general is excellent, very good, good, fair, or poor?

**Codes**

1 Excellent

2 Very good

3 Good

4 Fair

5 Poor

8 DK

9 NA; refused

**"AGE OF HEAD "**

Age of 20XX Head

This variable represents the actual age of the 20XX Head of the FU. The minimum value is usually 18, although in rare cases a person under 18 might become Head.

**Codes**

14 - 120 Actual age

999 DK; NA

**"SEX OF HEAD "**

Sex of 20XX Head

**Codes**

1 Male

2 Female

**"COMPLETED ED-HD "**

Head's Completed Education Level

Values in the range 1-16 represent the actual grade of school completed; e.g., a value of 8 indicates that the Head completed the eighth grade. A code value of 17 indicates that the Head completed at least some postgraduate work.

**Codes**

0 Completed no grades of school

1 - 16 Actual number  
17 At least some post-graduate work  
99 DK; NA

**"AGE YOUNGEST CHILD "**

Age of Youngest Person Now in the FU Under 18 Years of Age

The range of values for this variable represents the actual age in years of the youngest FU Member in this age range and excludes Heads and Wives/"Wives"; note that a child's age is not coded 02 (two years old) until he/she reaches his/her second birthday.

**Codes**

1 Newborn up to second birthday  
2 - 17 Actual age  
999 DK; NA; refused  
0 Inap.: no persons aged 17 or younger in FU

**"BC1 EMPLOYMENT STATUS-1ST MENTION "**

BC1. We would like to know about what (you/HEAD) (do/does) -- (are/is) (you/HEAD) working now, looking for work, retired, keeping house, a student, or what?--FIRST MENTION

**Codes**

1 Working now  
2 Only temporarily laid off, sick leave or maternity leave  
3 Looking for work, unemployed  
4 Retired  
5 Permanently disabled; temporarily disabled  
6 Keeping house  
7 Student  
8 Other; "workfare"; in prison or jail  
99 DK; NA; refused

**"DE1 EMPLOYMENT STATUS-1ST MENTION "**

DE1. We would like to know about what (you/WIFE/"WIFE") (do/does)--(are/is) (you/she) working now, looking for work, retired, keeping house, a student, or what?--FIRST MENTION

**Codes**

1 Working now  
2 Only temporarily laid off, sick leave or maternity leave  
3 Looking for work, unemployed  
4 Retired  
5 Permanently disabled; temporarily disabled  
6 Keeping house  
7 Student  
8 Other; "workfare"; in prison or jail  
99 DK; NA  
0 Inap.: no Wife/"Wife" in FU
